# Supplementary material for: Removal of persistent textile dyes from wastewater by Fe(ii)/H2O2/H3NOH+ integrated system: process performance and limitations
Source: Royal Society of Chemistry journal article supplement (doi:10.1039/d2va00011c), 2022-01-01
Supplement: d2va00011c1.pdf [file d2va00011c1.pdf]

## Supplementary Material

### Removal of persistent textile dyes from wastewater by Fe(II)/H<sub>2</sub>O<sub>2</sub>/H<sub>3</sub>NOH<sup>+</sup> integrating system: process performance and limitations

Slimane Merouani<sup>1,\*</sup>, Aissa Dehane<sup>2</sup>, Aouattef Belghit<sup>1</sup>, Oualid Hamdaoui<sup>3</sup>, Nour El Houda Boussalem<sup>1</sup>, Hassina Daif<sup>1</sup>

<sup>1</sup> Laboratory of Environmental Process Engineering, Department of Chemical Engineering, Faculty of Process Engineering, University Salah Boubnider-Constantine 3, P.O. Box 72, 25000 Constantine, Algeria

<sup>2</sup> Laboratory of Environmental Engineering, Department of Process Engineering, Faculty of Engineering, Badji Mokhtar – Annaba University, P.O. Box 12, 23000 Annaba, Algeria

<sup>3</sup> Chemical Engineering Department, College of Engineering, King Saud University, P.O. Box 800, 11421 Riyadh, Saudi Arabia

---

\* The corresponding author (S. Merouani)

E-mail address: s.merouani@yahoo.fr, s.merouani03@gmail.com

ORCID iD: <https://orcid.org/0000-0001-8182-8341>

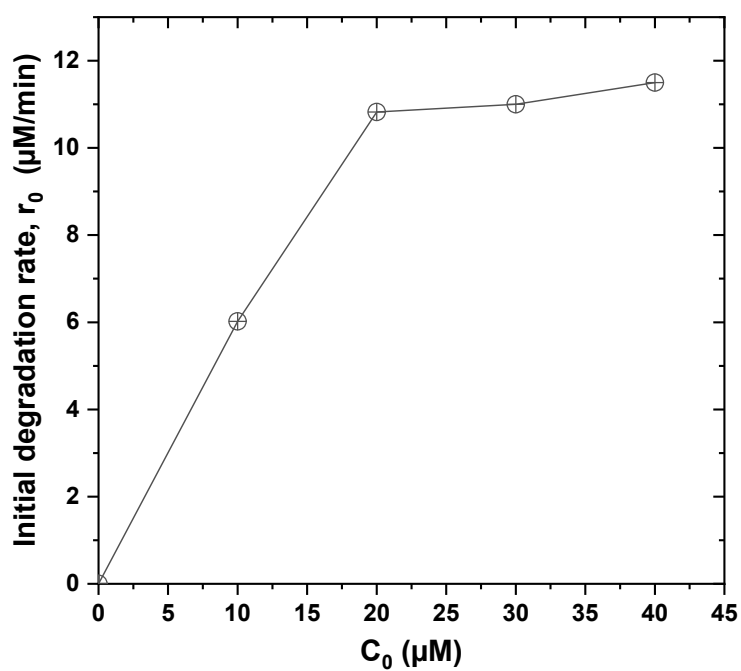

**Fig. S1.** Initial degradation rate of FB versus its initial concentration in the Fe(II)/H<sub>2</sub>O<sub>2</sub>/hydroxylamine system ((Vol. = 200 mL, pH 3, Temp. ~ 25 °C,  $C_0 = 20\text{-}40$   $\mu\text{M}$ ,  $[\text{Fe(II)}]_0 = 0.05$  mM,  $[\text{H}_2\text{O}_2]_0 = 0.5$  mM,  $[\text{H}_3\text{NOH}^+]_0 = 0.5$  mM).

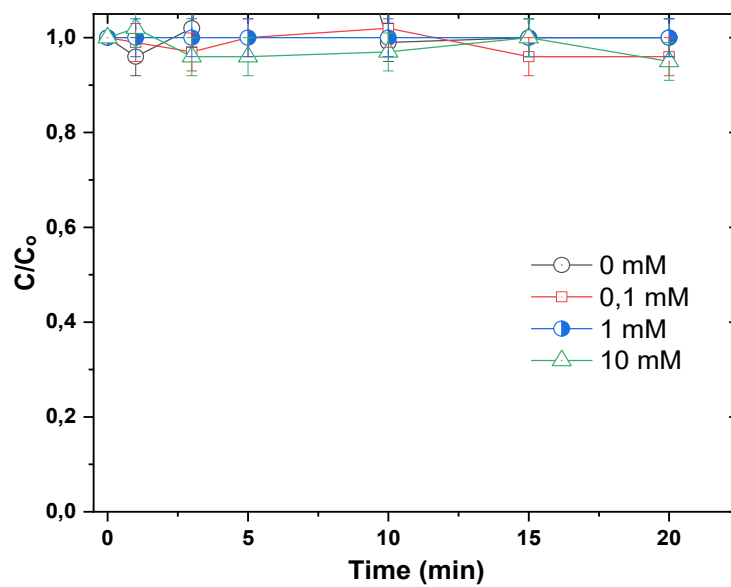

**Fig. S2.** FB degradation in the  $\text{H}_2\text{O}_2/\text{Cl}^-$  system (no hydroxylamine ad Fe(II)) at pH 3 and 25 °C (Vol. = 200 mL,  $[\text{Cl}^-]_0 = 0.05$  mM,  $[\text{H}_2\text{O}_2]_0 = 0.5$  mM).
